# Supplementary material
Source: PubMed Central journal article supplement (PMC4196617)
Supplement: 55b660ba885d8f4a523e5c5b33ba2ef6_genetics.114.167445-1.pdf [file 55b660ba885d8f4a523e5c5b33ba2ef6_genetics.114.167445-1.pdf]

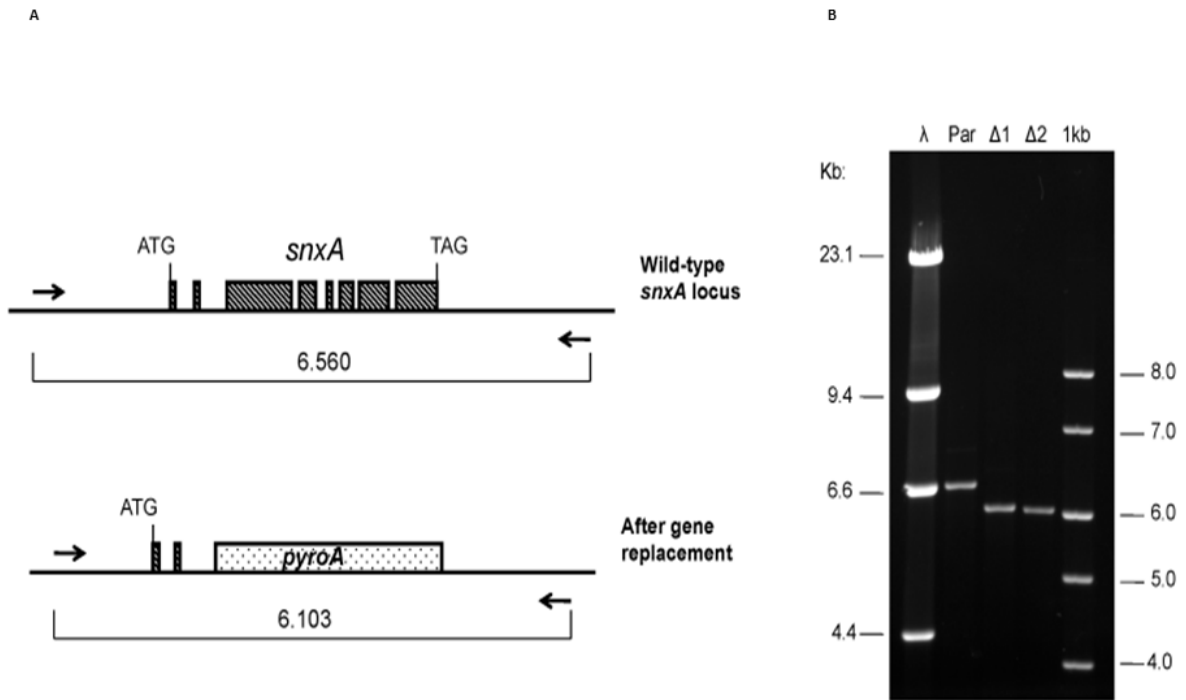

**Figure S3** *snxA* deletion. *snxA*<sup>+</sup> (AN3739) was deleted from tSWJ 2973 (*pyrG89*; *pyroA4* Kutr-L::*pyrG*<sup>Af</sup>; *nicA2*; *riboB2*) by one-step replacement with *A. fumigatus pyroA*. **A.** Gene deletion strategy. Arrows indicate the position of PCR primers that lie outside of the linear DNA used to delete *snxA*. The primers should amplify a 6.56 kb product from the parent *snxA*<sup>+</sup> strain, and a 6.1 kb product from the deleted locus. **B.** Trans-locus PCR of the parent *snxA*<sup>+</sup> strain and two  $\Delta snxA::pyroA$  transformants. Key to lanes:  $\lambda$ , Lambda *Hind*III DNA size markers; Par, tSWJ 2973 *snxA*<sup>+</sup> parent;  $\Delta 1$  &  $\Delta 2$ , tSWJ 4412/4413  $\Delta snxA::pyroA$  transformants; 1kb, 1kb ladder.
