# Supplementary material
Source: PubMed Central journal article supplement (PMC4196617)
Supplement: 97c952af6a91a00142315fa312b7cb5d_genetics.114.167445-11.pdf [file 97c952af6a91a00142315fa312b7cb5d_genetics.114.167445-11.pdf]

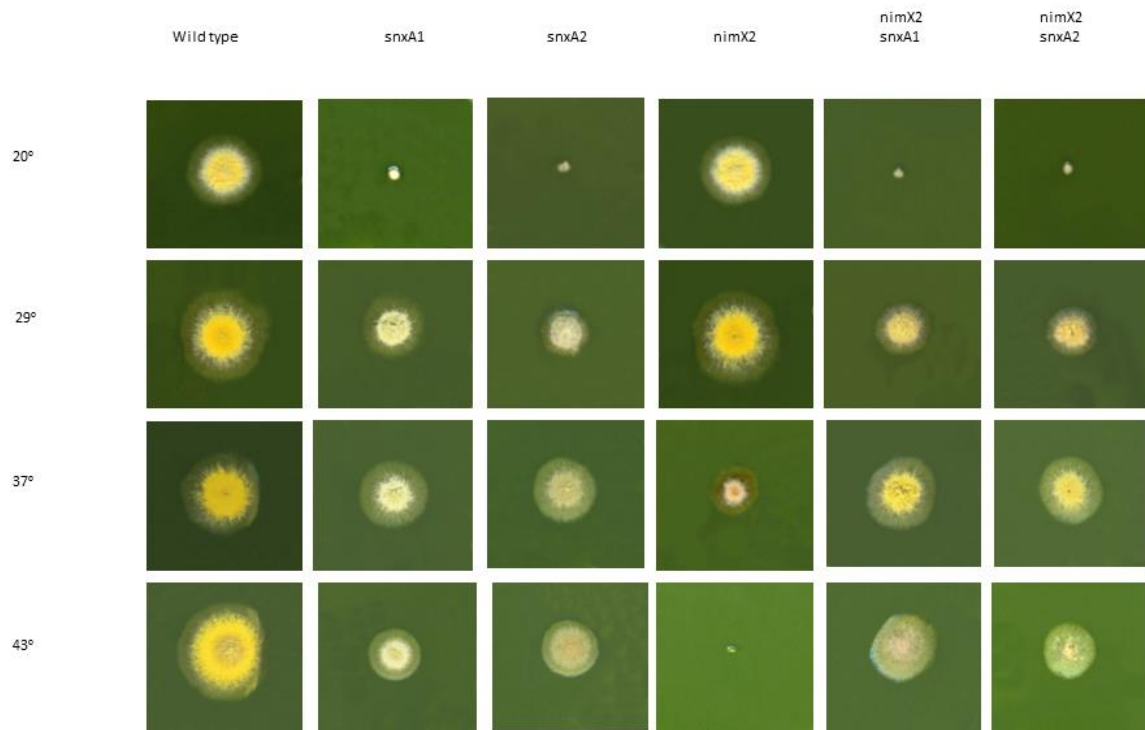

**Figure S7** *snxA2* suppresses the heat-sensitivity of *nimX2<sup>cdk1</sup>*. Growth phenotypes of *snxA1* and *snxA2* single and *nimX2* double mutants on minimal medium at the indicated temperatures. Days of growth at each temperature as follows: 20°, 6 days; 29°/37°/43°, 3 days.
