# Supplementary material
Source: PubMed Central journal article supplement (PMC4196617)
Supplement: 959138b4c6c5e0db794b1fc4074ca5ed_genetics.114.167445-8.pdf [file 959138b4c6c5e0db794b1fc4074ca5ed_genetics.114.167445-8.pdf]

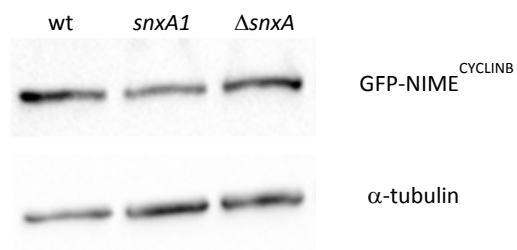

**Figure S11** GFP-NIME<sup>CYCLINB</sup> expression is not altered in *snxA1* or  $\Delta snxA$  strains. Total protein extracts from strains harboring GFP-NIME<sup>CYCLINB</sup> together with *snxA*<sup>+</sup> (wt), *snxA1*, or  $\Delta snxA$  were run on SDS-PAGE, blotted to nitrocellulose, and the blot probed with anti-GFP antibody/HRP secondary antibody. The blot was stripped and re-probed with anti  $\alpha$ -tubulin antibody/HRP secondary antibody. Strains used were the same strains as in Figure 11.
