# Supplementary material
Source: PubMed Central journal article supplement (PMC4196617)
Supplement: bcfd6579853ce618e9fb58e28a4143ff_genetics.114.167445-6.pdf [file bcfd6579853ce618e9fb58e28a4143ff_genetics.114.167445-6.pdf]

**Table S2 PCR primers used in this study**

**A. snxA gene deletion<sup>1,2</sup>:**

|            |                                                                                               |
|------------|-----------------------------------------------------------------------------------------------|
| snxA 5-For | 5' TCT TTC TCT ACA TAT ATA CTC TGC AAG CAC TCA 3'                                             |
| snxA 5-Rev | 5' <u>CTC TCT CGC CAT TGT ATT TGT GGT</u> ATA CTC GTA GTC GCC GTA<br>AGG CAT TA 3'            |
| snxA 3F    | 5' <u>GGT TCA TTC TTG TTA GGG TGT TCT GTG CAA</u> TGT CTA CAA TAT<br>GCT ACT CTG GCT TTG G 3' |
| snxA 3R    | 5' TCG TTG ATA AGA TAA ATG TGG GAA GGT 3'                                                     |
| snxA Ne5F  | 5' CGT ACT CGC TTT ACA ATA GCA GCA TT 3'                                                      |
| snxA Ne3R  | 5' GGC TAT CCC AGA CCA GAG CAA CG 3'                                                          |

---

<sup>1</sup> *A. fumigatus* *pyroA* marker tails underlined

<sup>2</sup> snxA 5-For and snxA 3R were used in trans-locus PCR for molecular diagnosis

**B. snxA C-terminal GFP/mRFP tagging<sup>3,4</sup>:**

|           |                                                                                        |
|-----------|----------------------------------------------------------------------------------------|
| snxA-GSP1 | 5' TGG CTT CGG AGG CTA TGG C 3'                                                        |
| snxA-GSP2 | 5' CAT GAT CTG ATC CTG GGT AAG TCC 3'                                                  |
| snxA-GFP1 | 5' GGA CTT ACC CAG GAT CAG ATC ATG <u>GGA GCT GGT GCA GGC</u><br><u>GCT GGA GCC</u> 3' |
| snxA-GFP2 | 5' GCT AAG CAG GGA AAC ACG CTA GTA <u>CTG TCT GAG AGG AGG</u><br><u>CAC TGA TGC</u> 3' |
| snxA-GSP4 | 5' TCT TGA AAC TGA CCG CCT CTC AT 3'                                                   |
| snxA NE-1 | 5' GTC TCA AAC GTA AGT CTT TCC ATC C 3'                                                |
| snxA NE-2 | 5' CGC TCC TCG CAC GAA TCG 3'                                                          |

---

<sup>3</sup> GFP/mRFP linkers underlined

<sup>4</sup> snxA GSP1 and snxA GSP4 were used in trans-locus PCR for molecular diagnosis

**C. alcA::snxA overexpression construct:**

alcA::snxA 5-FOR<sup>5</sup> 5' CTCA ACT AGT *GTC TTA **ATG** CCT TAC GGC GAC TAC GAG* 3'

alcA::snxA 3-REV<sup>6</sup> 5' CCTC GGA TCC *AAT GAG CAT AGT GAG ATG GAT AAA TAA CAA*  
CAA C 3'

---

<sup>5</sup> *SpeI* site underlined; start codon in **bold**; *snxA* genomic DNA sequence italicized.

<sup>6</sup> *BamHI* site underlined; *snxA* genomic DNA sequence italicized.

**D. Construction of (GA)<sub>3</sub>GFGGA-myc9 epitope tag**

myc-tandem FOR 5' GGT GCT GAA CAG AAA CTT ATT TCT GAA GAA GAT CTT  
GGT GCT GAA CAG 3'

myc-tandem REV 5' AGC ACC AAG ATC TTC TTC AGA AAT AAG TTT CTG TTC  
AGC ACC AAG ATC 3'

BspDI-linker-myc9 FOR<sup>7</sup> 5' CCTT ATC GAT *GGA GCT GGA GCA GGT GCG GGA TTC*  
*GAT GGA* GCT GAA CAG AAA CTT ATT TC

myc9-Stop-HindIII REV<sup>8</sup> 5' TTCC AAG CTT **TCA** CTT GAT AGC ACC AAG GTC TTC  
TTC AGA 3'

---

<sup>7</sup> *BspDI* site underlined; (GA)<sub>3</sub>GFDGA linker in italics; underlined and bolded **A** indicates a nucleotide change in order to improve specificity of amplification.

<sup>8</sup> *HindIII* site underlined; STOP codon in **bold italics**; underlined and bolded **G** indicates a nucleotide change in order to improve specificity of amplification.

**E. qRT-PCR:**

actF: 5' TTC GGG TAT GTG CAA GGC 3'

actR: 5' TCG TGA CAA CAC CGT GCT 3'

snxA-q1<sup>9</sup>: 5' AGA *GAC TTC AAT CGC* CAA GTT CAC G 3'

snxA-q2: 5' GCT CTC GTG GCA CTG GTG TG 3'

snxA-q3: 5' CGG TAG GTT GGG CAT CAT CC 3'

---

<sup>9</sup> italics, exon 10; underlined, exon 11.
