# Supplementary material
Source: PubMed Central journal article supplement (PMC4196617)
Supplement: c87faa04915aefffa785015a5c51af0c_genetics.114.167445-7.pdf [file c87faa04915aefffa785015a5c51af0c_genetics.114.167445-7.pdf]

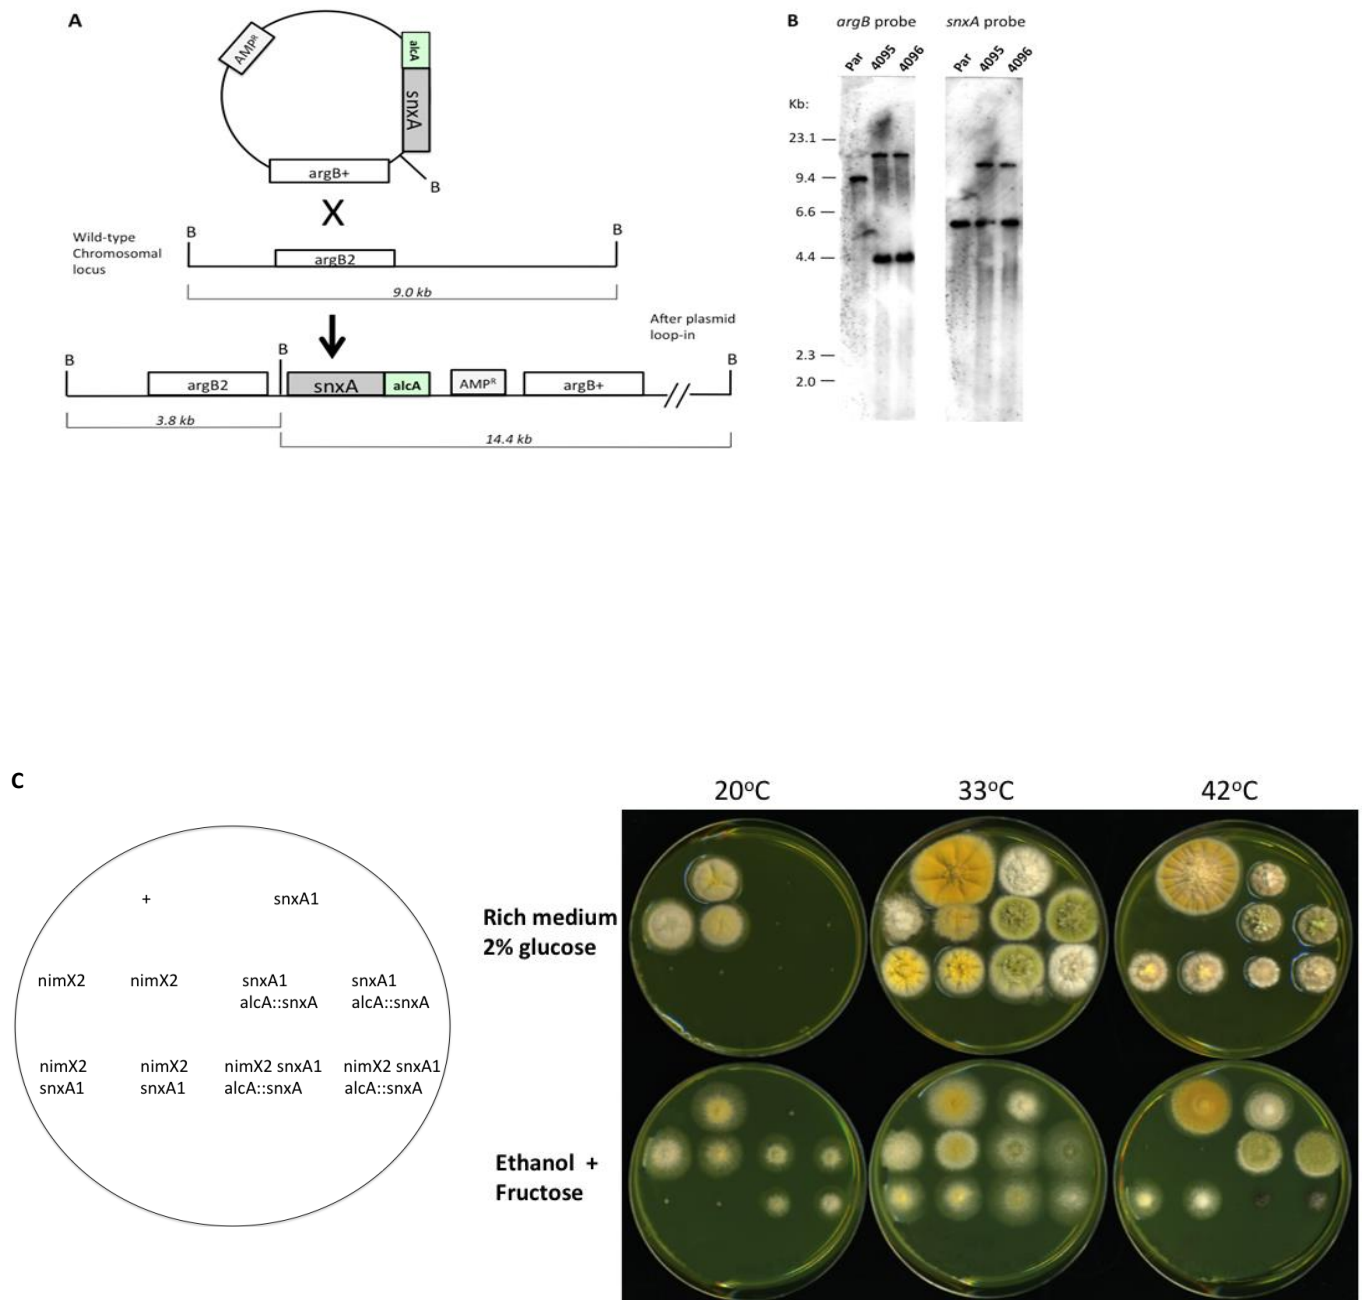

**Figure S4** *alcA::snxA* construct. A *snxA*<sup>+</sup> wild-type 9-exon genomic clone was fused with the *alcA* alcohol dehydrogenase gene promoter as described in Materials & Methods. An *alcA::snxA*-containing plasmid was transformed into a *snxA1* strain (SWJ 3676: *riboA1*; *snxA1*; *argB2*; *pyroA4*; *chaA1*), and *argB*<sup>+</sup> transformants were recovered and purified. Total genomic DNAs were digested with *Bam*HI and subjected to Southern blotting. (A) Southern blot strategy for plasmid integration at the *argB* locus. B, *Bam*HI. (B) Southern blots were analyzed using probes corresponding to the coding regions of *Aspergillus nidulans argB* and *snxA*. When probed with *argB*, single-copy integration at the *argB* locus should replace the 9.0 kb wild-type *Bam*HI band with two bands of 3.8 and 14.4 kb, respectively. Probing the same blot with *snxA* should produce a 6 kb band corresponding to the wild-type *snxA* locus, and a 14.4 kb band corresponding to integration at *argB*. Par, parental strain; 4095 & 4096, tSWJ 4095 and tSWJ 4096 (cf. Table S1). (C) *snxA*<sup>+</sup> overexpression rescues pleiotropic *snxA1* phenotypes. An *alcA*-driven copy of wild-type

*snxA* (*alcA::snxA<sup>+</sup>*) was integrated at the *argB* locus, and then combined in strains bearing *snxA1* or *snxA1 + nimX2* mutations. Complementation of *snxA1* cold-sensitive and suppressor phenotypes was assessed by comparing growth at three temperatures during *alcA* repression (rich media containing 2% glucose) or *alcA* induction (minimal media containing 200mM ethanol + 0.04% fructose). Strains were point-inoculated using conidia from fresh streaks. Two representative strains of each genotype are shown. Plates were incubated for the following times: 20°C, 10 days; 33°C and 42°C, 3 days.
