# Supplementary material
Source: PubMed Central journal article supplement (PMC4196617)
Supplement: d7aa95cc7142a0f81d1110b4518431e6_genetics.114.167445-5.pdf [file d7aa95cc7142a0f81d1110b4518431e6_genetics.114.167445-5.pdf]

B. Alignment of AN3739 (*snxAI*) with human hnRNP-M

```

AN3739_snxA_484aa  MPYGDYEYDTRDRAQRESRSPRRSRSPRRSRRSYSSPRSRSRDRDDYR
hnRNP_M_730aa_Human MAAGV-EAAAEVAATE-----
* . * * * : : * *

AN3739_snxA_484aa  RSDRRSRSPMSAAQGPSGGHSGSGYSSGSYPPPPR--SFEDRAVAKEQ
hnRNP_M_730aa_Human -----IKMEEESGAPGVPSGNGAPGPKGEGERPAQNEKRKEKNIKRGG
* . * . . * * * . * * * . * : . : : : :

AN3739_snxA_484aa  MMQSVRESSQDRRVYVGNLSYDVKWHHLKDFMRQ-AGDVIFADVLLLPN
hnRNP_M_730aa_Human NRFEFYANPTKRYRAFITNIPFDVKWQSLKDLVKEKVGVEVTVVELLMDAE
. . . : * : : * : : * : : * : : * : : * : : * : : * : :

AN3739_snxA_484aa  GMSKGCGIVEYATREQAONAVNTLSNQNLMNRLVYVREDREPEPR-FSGG
hnRNP_M_730aa_Human GKSRGCAVVEFKMEESMKAAEVLNKHLSLGRPLKVKEDPDGEHARRAMQ
* * : * : * : * : * . * : * : * : * : * : * : * : * : * :

AN3739_snxA_484aa  PSRGDFGGPGRGGGYGGGGGG-----
hnRNP_M_730aa_Human K-----VMATTGGMGMPGGPGMITIPPSILNPNIPNEIIHALQAG
. * * * *

AN3739_snxA_484aa  --GRQLYVSNLPFNVGWQDLKDLFRQAAQQTVIRADVHTDASGRPKGSG
hnRNP_M_730aa_Human RLGSTVTFVANLDYKVGWKKLKEVFSMA--GVVVRADILEDKDGKSRGIG
* : * : * * : * : * : * : * * * * : * : * : * * : * : *

AN3739_snxA_484aa  IVAFESPDDARNAIIQFNGYDWQGRTEVREDRFA-----
hnRNP_M_730aa_Human TVTFEQSIEAVQAISMFNGQLLFDRPMHVKMDERALPKGDFPPPERPQQL
* : * : * . * : * : * . * * * . * : * : * : * . *

AN3739_snxA_484aa  -----GSGPGMGRGGYGGFGGRG-GFGGRGGF
hnRNP_M_730aa_Human PHGLGGIGMGLPGGQPIDANHLNKIGMGNIGPAGMMEGIGFGINKMG
. . * * * . * * : * * * * .

AN3739_snxA_484aa  GCRGCGFGGGFGCRGCGFGG-----GYGGPPS
hnRNP_M_730aa_Human GMEGPFGGGMENMGRFGSGMNMGRINEILSNALKRGEIIAKQGGGGGGGS
* . * * * : . * * * . * * * *

AN3739_snxA_484aa  GPGFD-AGPSVP-----
hnRNP_M_730aa_Human VPGIERMGPIDRLGGAGMERMAGLGHGMDRVGSIERMGLVMDRMGSV
* : : * * :

AN3739_snxA_484aa  -----
hnRNP_M_730aa_Human ERMGSIERMGPLGLDHMASIERMQTMERIGSVERMAGMGFLERM

AN3739_snxA_484aa  -----PNPF
hnRNP_M_730aa_Human AAPIDRVGQTIERMGSVERMGPAIIERMGLSMERMVPAGMGAGLERMGPV
* *

AN3739_snxA_484aa  TDYAT-----
hnRNP_M_730aa_Human MDRMATGLERMGANNLERMGLERMGANSLERMGLERMGANSLERMGPAMG
* :

AN3739_snxA_484aa  -----S
hnRNP_M_730aa_Human PALGAGIERMGLAMGGGGGASFDRAIEMERGNFGGSFAGSFGGAGGHAPG
.

AN3739_snxA_484aa  GGEKSNTIYVRNLPWSTCNDLVDLFSTIGKVERAEIQYEPNGRSRGTGV
hnRNP_M_730aa_Human VARKACQIFVRNLPDFFTWKMLKDKFNECGHVLYADIKME-NGKSKGCGV
. * : * : * : * : * : * . * * * . * * * * : * * : * * : * *

AN3739_snxA_484aa  VQFDNADTAETSIAKFTGYQYGGRPLGITFVKYLTPAQGPADPMDDAQPT
hnRNP_M_730aa_Human VKFESPEVAERACRMMNGMKLSGREIDVR-----
* : * : * : * : * : * : * : * : * :

AN3739_snxA_484aa  GGLTQDQIM
hnRNP_M_730aa_Human ----IDRNA
* :

```

Figure S6 Alignment of SNXA cDNAs with *S. cerevisiae* and human homologs. Sequences were aligned using TCOFFEE (<http://www.ebi.ac.uk/Tools/msa/tcofee/>). A. Alignment of two alternative SNXA cDNAs with *S. cerevisiae* HRB1/GPB2.

Magenta denotes alternative N-terminal peptides in SNXA cDNAs. Green, RNA Recognition Motifs (RRM); aqua in SNXA and yellow in HRB1/GBP2 denote N-terminal SR dipeptides; gray and red indicate RGG tripeptides in HRB1/GRB2 and SNXA, respectively. B. Alignment of a SNXA cDNA with human hnRNP-M. Colors as in A., except that yellow in hnRNP-M denotes RMG/RVG/RIG/RMA/RMV tripeptides.
