# Supplementary material
Source: PubMed Central journal article supplement (PMC4196617)
Supplement: ec7743f733fd624c3b401b21aa30b979_genetics.114.167445-3.pdf [file ec7743f733fd624c3b401b21aa30b979_genetics.114.167445-3.pdf]

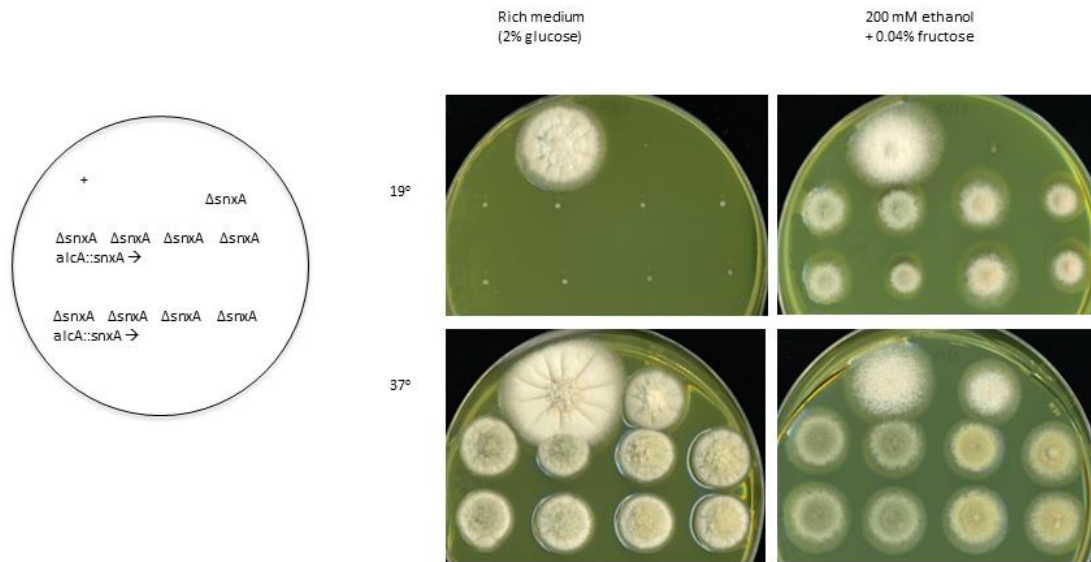

**Figure S10** *snxA* overexpression complements a *snxA* gene deletion. Seven independently Isolated strains (tSWJ 4324/4325/4326/5187/5188/5189/5190) carrying one copy of *alcA::snxA* integrated at the *argB* locus and a deletion of the 9-exon *snxA* genomic locus were grown on *alcA* repressing medium (2% glucose) or inducing medium (200 mM ethanol + 0.04% fructose) at the restrictive and permissive temperatures for  $\Delta snxA$ . Days of growth: 19°, 8 days; 37°, 3 days.
